# Supplementary material
Source: PubMed Central journal article supplement (PMC5061892)
Supplement: npp201681x1.pdf [file npp201681x1.pdf]

**SUPPLEMENTAL INFORMATION**

**Nucleus accumbens acetylcholine receptors modulate dopamine and motivation**

Anne L. Collins, Tara J. Aitken, Venuz Y. Greenfield, Sean B. Ostlund, Kate M. Wassum

## **Supplemental Results**

### ***Training data.***

By the end of Pavlovian training all rats entered the food-delivery port significantly more during the CS<sup>+</sup> probe period (at the CS<sup>+</sup> onset, but prior to reward delivery; Experiment 1: 30.24 entries/min, SEM= 2.52; Experiment 2: 25.57 entries/min, SEM= 2.95) relative to the baseline, CS-free period (Experiment 1:  $t_{23}=6.018$ ,  $p<0.0001$ ; Experiment 2:  $t_{14}=6.826$ ,  $p<0.0001$ ). At the end of instrumental training rats in Experiment 1 pressed at an average rate of 21.08 presses/min (SEM= 1.57) and in Experiment 2 at an average rate of 25.35 presses/min (4.61).

**Supplemental Figures**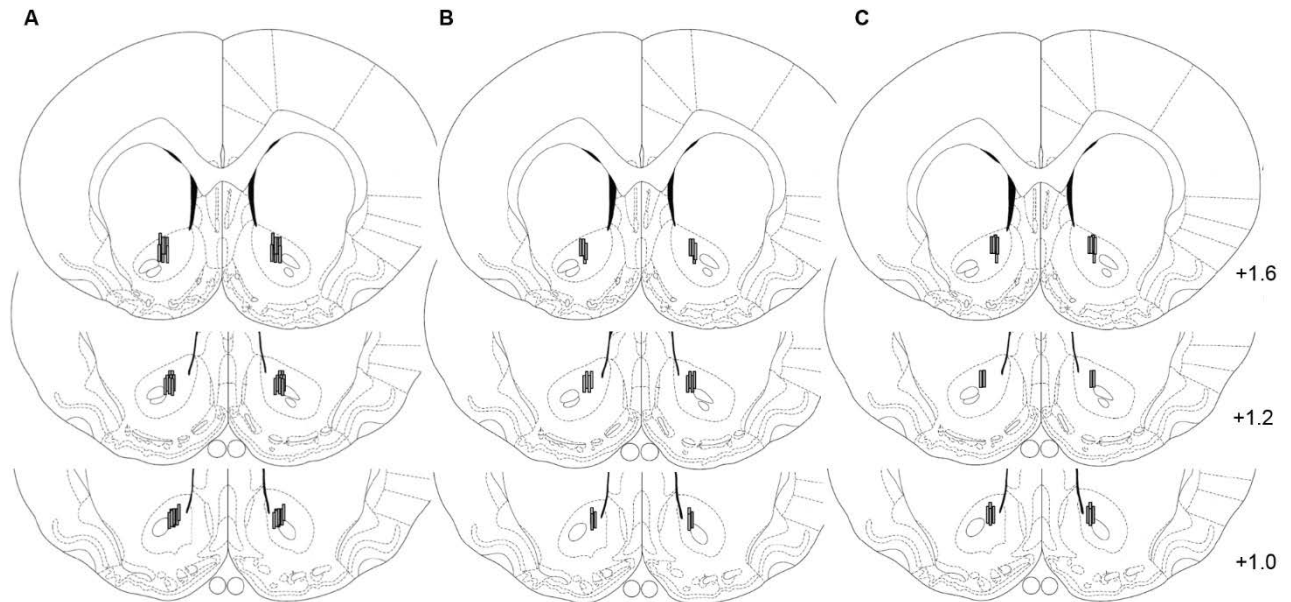**Supplemental Figure 1: Histological verification of NAc infusion sites for Experiment 1.**

Schematic representation of infusion sites in NAc core. Coronal section drawings taken from (Paxinos and Watson, 1998). Numbers to the lower right represent anterior-posterior distance (mm) from bregma. **A.** Experiment 1. **B.** Supplemental Experiment 1B (intra-NAc scopolamine multi-dose experiment). **C.** Supplemental Experiment 1C (intra-NAc mecamylamine multi-dose experiment).

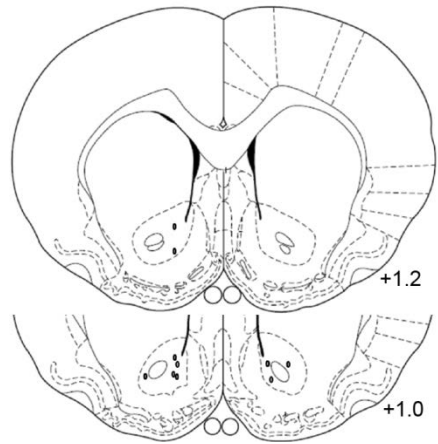

**Supplemental Figure 2: Histological verification of NAc electrode placement for Experiment 2.** Schematic representation of recording sites in NAc core. Coronal section drawings taken from (Paxinos *et al*, 1998). Numbers to the lower right represent anterior-posterior distance (mm) from bregma. Circles represent recording sites from electrode placement. Injector tip was always laterally positioned from electrode tip.

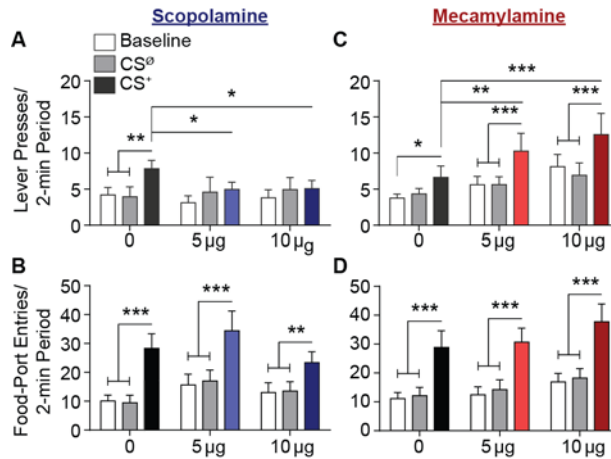

**Supplemental Figure 3. Effect of intra-NAC scopolamine or mecamlamine at multiple doses on Pavlovian-to-instrumental transfer. A & B.** Supplemental Experiment 1B. Rats ( $n=9$ ) were trained and tested as described for Experiment 1 in the main text, with the exception that PIT tests were conducted following bilateral infusion of either 0 (ACSF-vehicle), 5, or 10  $\mu\text{g}$  dose of scopolamine. **A.** The PIT effect. Number of lever presses during each 2-min period, averaged across trials compared between the CS-free (baseline), neutral stimulus (CS<sup>∅</sup>), and reward-predictive cue (CS<sup>+</sup>) periods (main effect of CS period:  $F_{2,16}=3.85$ ,  $p=0.04$ ; Drug dose:  $F_{2,16}=0.80$ ,  $p=0.47$ ; Dose x CS period:  $F_{4,32}=1.64$ ,  $p=0.19$ ). **B.** Conditioned food-port approach responding. Number of entries into the food-delivery port during each 2-min CS period, averaged across trials compared between the baseline, CS<sup>∅</sup>, and CS<sup>+</sup> periods (main effect of CS period:  $F_{2,16}=25.13$ ,  $p<0.0001$ ; Drug dose:  $F_{2,16}=1.148$ ,  $p=0.34$ ; Dose x CS period:  $F_{4,32}=1.490$ ,  $p=0.23$ ). **C & D.** Supplemental Experiment 1C. Rats ( $n=11$ ) were trained and tested as described for Experiment 1 in the main text, with the exception that PIT testing was conducted following bilateral infusion of either 0, 5, or 10  $\mu\text{g}$  dose of mecamlamine. **C.** The PIT effect. Number of lever presses during each 2-min period, averaged across trials compared between the baseline, CS<sup>∅</sup>, and CS<sup>+</sup> periods (main effect of CS period:  $F_{2,20}=7.81$ ,  $p=0.003$ ; Drug dose:  $F_{2,20}=3.85$ ,  $p=0.04$ ; Dose x CS period:  $F_{4,40}=1.15$ ,  $p=0.35$ ). **D.** Conditioned food-port approach responding. Number entries into the food-delivery port during each 2-min CS period, averaged across trials compared between the baseline, CS<sup>∅</sup>, and CS<sup>+</sup> periods (main effect of CS period:  $F_{2,20}=41.69$ ,  $p<0.001$ ; Drug dose:  $F_{2,20}=3.101$ ,  $p=0.07$ ; Dose x CS period:  $F_{4,40}=0.1803$ ,  $p=0.95$ ). In all cases the CS<sup>+</sup> elevated food-port entries relative to the baseline and CS<sup>∅</sup> periods ( $p<0.001$ ). Error bars represent  $\pm 1$  SEM. \*= $p<0.05$ , \*\*= $p<0.01$ , \*\*\*= $p<0.001$ .

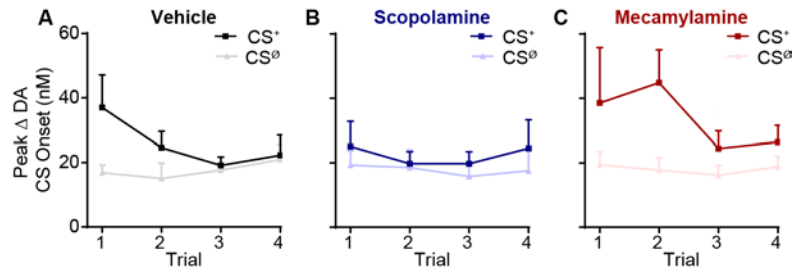

**Supplemental Figure 4. Time course of the effect of intra-NAc muscarinic and nicotinic acetylcholine receptor blockade on cue-evoked dopamine signaling during Pavlovian-to-instrumental transfer.** Peak dopamine concentration change in the 30 s period following CS<sup>+</sup> or CS $\emptyset$  onset across each of the 4 trials for the PIT test following unilateral infusion of vehicle (A), scopolamine (B), or mecamylamine (C) into the extracellular space surrounding the recording electrode. Trials in which >10% of the data points had residual values in excess of the  $Q\alpha$  were omitted from the analysis. These missing data points precluding our ability to run an appropriate within-subject analysis on these data. Although there was an apparent time-course effect on the peak CS<sup>+</sup>-evoked dopamine response in the vehicle condition, likely due to the within-test extinction learning resulting from repeated CS<sup>+</sup> presentations without accompanying reward, both scopolamine and mecamylamine appeared to have similar effects throughout the duration of the PIT test.

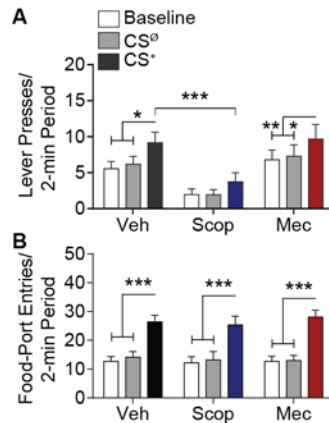

**Supplemental Figure 5. Expression of Pavlovian-to-instrumental transfer following unilateral inactivation of nucleus accumbens muscarinic or nicotinic acetylcholine receptors.** Rats in Experiment 2 were given 3 PIT tests, one each following unilateral infusion of vehicle (Veh), scopolamine (Scop; 10  $\mu$ g), or mecamylamine (Mec; 10  $\mu$ g) directly into the extracellular space surrounding a chronically-implanted carbon-fiber microelectrode, which was used to make FSCV dopamine measurements. **A.** Lever presses, averaged across trials, compared between the CS-free (baseline; average of all 2 min pre-CS periods after the first CS), neutral stimulus (CS<sup>0</sup>), and reward-predictive cue (CS<sup>+</sup>) periods (main effect of CS Period:  $F_{2,28}=6.39$ ,  $p=0.005$ ; unilateral Drug treatment:  $F_{2,28}=10.71$ ,  $p=0.0004$ ; CS period x Drug interaction:  $F_{4,56}=0.41$ ,  $p=0.80$ ). The CS<sup>+</sup> significantly elevated responding above baseline levels for the vehicle ( $p<0.01$ ) and mecamylamine ( $p<0.01$ ) conditions, but only marginally significantly increased lever pressing following unilateral infusion of scopolamine ( $p=0.09$ ). A one-way ANOVA on the PIT data following unilateral intra-NAc infusion of scopolamine did reveal a significant main effect of CS period (Baseline, CS<sup>0</sup>, CS<sup>+</sup>  $F_{2,28}=5.34$ ,  $p=0.02$ ), with a significant CS<sup>+</sup>-induced elevation in lever pressing above both baseline and CS<sup>0</sup> periods ( $p<0.05$ , in both cases). Lever pressing during the CS<sup>+</sup> was, however, lower following unilateral intra-NAc infusion of scopolamine, than following intra-NAc vehicle ( $p<0.001$ ), indicating that, although this unilateral treatment did not abolish PIT (as was seen with bilateral infusion), it did attenuate it. Importantly however, the attenuating influence of this treatment on cue-evoked dopamine signaling was shown not to be a consequence of this attenuated in cue-evoked lever pressing. These two variables were not significantly correlated (Pearson  $r_{10}=-0.22$ ,  $p=0.54$ ) and there was no difference in the CS<sup>+</sup>-evoked dopamine response on trials in which the subject made no lever presses relative to trials with lever press activity (Average CS<sup>+</sup>-evoked dopamine response without lever presses: 21.35, SEM=3.02, with presses: 20.21, 2.46;  $t_{12}=0.28$ ,  $p=0.79$ ). **B.** Conditioned food-port approach responding. Number of entries into the food-delivery port during

each 2-min period, averaged across trials compared between the baseline, CS<sup>∅</sup>, and CS<sup>+</sup> periods. Following each drug treatment the CS<sup>+</sup> significantly elevated food-port entries relative to the CS<sup>∅</sup> (main effect of CS period:  $F_{2,28}=55.64$ ,  $p<0.0001$ ; Drug:  $F_{2,28}=0.10$ ,  $p=0.91$ ; CS x Drug interaction:  $F_{4,56}=0.65$ ,  $p=0.63$ ).



### References

Paxinos G, Watson C (1998). *The rat brain in stereotaxic coordinates*, 4th edn. Academic Press.
